# Supplementary material
Source: Springer Nature journal article supplement (https://www.springermedizin.de/resource/supplementary/12943_2010_725_MOESM1_ESM.pdf/9554680)

**A**

-201  
TGTCTGGGTAGCACACAGCCTACCACAAGGCAAGGAAGGGGAGAAAGAAAAGACAGCTTTGGT  
-130  
TCTGGGGAGAAGGGGGAGGCAGGCCAGGGGAAGGAGGAGACAGAGGAGGAGGAGGGCCTTTG  
-56 -50  
AGTGGAGGTGGAGGGTGTAGACAGACCCTGCCAGAGCTCCAAGAGGCTTCCTGCTGCTCGCCTC  
+1 +19  
CTAAACCCCTCACATTCTGCAGCCCTTCAG

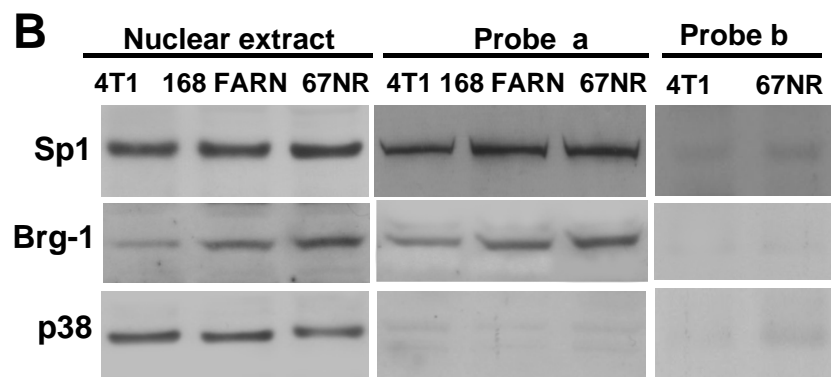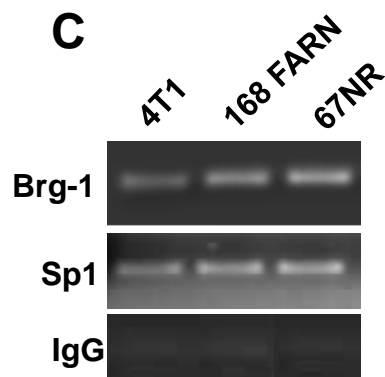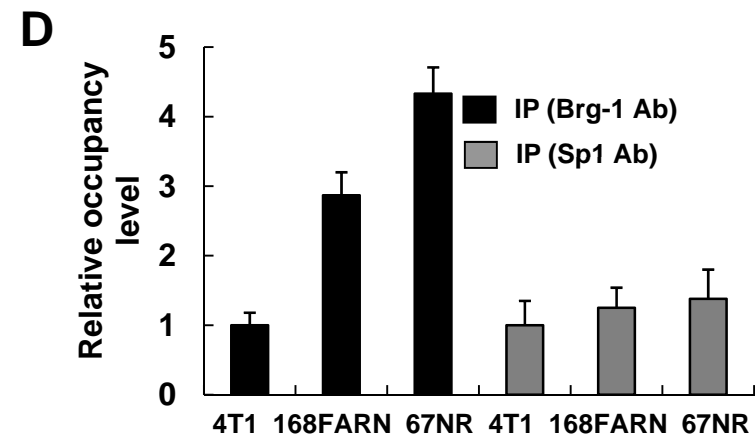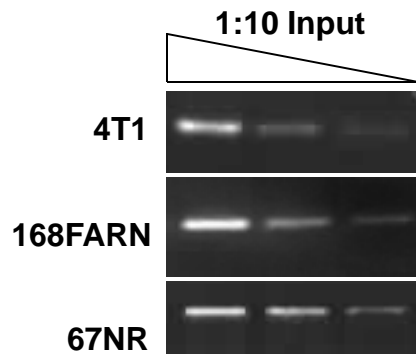

Supplement: MOESM1 [file 9554680]
